# Supplementary material for: CDK5-dependent phosphorylation and nuclear translocation of TRIM59 promotes macroH2A1 ubiquitination and tumorigenicity
Source: PubMed Central journal article supplement (PMC6728346; doi:10.1038/s41467-019-12001-2), 2019-09-05
Supplement: 41467_2019_12001_MOESM1_ESM.pdf [file 41467_2019_12001_MOESM1_ESM.pdf]

**Supplementary Table 1 GO pathway analysis of mH2A1-bound genes in distance from center of peak (2 kb) in LN229/EGFRvIII cells**

| Vehicle control |                                                                   |             |
|-----------------|-------------------------------------------------------------------|-------------|
| Category        | Term                                                              | FDR         |
| KEGG_PATHWAY    | hsa04080:Neuroactive ligand-receptor interaction                  | 1.85E-29    |
| KEGG_PATHWAY    | hsa04151:PI3K-Akt signaling pathway                               | 3.15E-28    |
| KEGG_PATHWAY    | hsa04024:cAMP signaling pathway                                   | 1.50E-17    |
| KEGG_PATHWAY    | hsa04015:Rap1 signaling pathway                                   | 6.65E-17    |
| KEGG_PATHWAY    | hsa05200:Pathways in cancer                                       | 4.80E-11    |
| KEGG_PATHWAY    | hsa04750:Inflammatory mediator regulation of TRP channels         | 5.64E-11    |
| KEGG_PATHWAY    | hsa04810:Regulation of actin cytoskeleton                         | 9.74E-11    |
| KEGG_PATHWAY    | hsa04014:Ras signaling pathway                                    | 5.19E-10    |
| KEGG_PATHWAY    | hsa04611:Platelet activation                                      | 3.10E-09    |
| KEGG_PATHWAY    | hsa04060:Cytokine-cytokine receptor interaction                   | 3.49E-08    |
| KEGG_PATHWAY    | hsa04630:Jak-STAT signaling pathway                               | 9.91E-08    |
| KEGG_PATHWAY    | hsa04510:Focal adhesion                                           | 1.63E-07    |
| KEGG_PATHWAY    | hsa04020:Calcium signaling pathway                                | 2.79E-07    |
| KEGG_PATHWAY    | hsa04713:Circadian entrainment                                    | 9.75E-07    |
| KEGG_PATHWAY    | hsa04512:ECM-receptor interaction                                 | 3.26E-06    |
| KEGG_PATHWAY    | hsa04921:Oxytocin signaling pathway                               | 4.49E-06    |
| KEGG_PATHWAY    | hsa04022:cGMP-PKG signaling pathway                               | 1.84E-05    |
| KEGG_PATHWAY    | hsa04970:Salivary secretion                                       | 6.37E-05    |
| KEGG_PATHWAY    | hsa04916:Melanogenesis                                            | 7.20E-05    |
| KEGG_PATHWAY    | hsa05142:Chagas disease (American trypanosomiasis)                | 6.66E-04    |
| KEGG_PATHWAY    | hsa04924:Renin secretion                                          | 8.19E-04    |
| KEGG_PATHWAY    | hsa04728:Dopaminergic synapse                                     | 8.93E-04    |
| KEGG_PATHWAY    | hsa05146:Amoebiasis                                               | 9.67E-04    |
| KEGG_PATHWAY    | hsa04650:Natural killer cell mediated cytotoxicity                | 0.004046853 |
| KEGG_PATHWAY    | hsa05218:Melanoma                                                 | 0.004288347 |
| KEGG_PATHWAY    | hsa04911:Insulin secretion                                        | 0.004325345 |
| KEGG_PATHWAY    | hsa04972:Pancreatic secretion                                     | 0.004997795 |
| KEGG_PATHWAY    | hsa04640:Hematopoietic cell lineage                               | 0.006344066 |
| KEGG_PATHWAY    | hsa05162:Measles                                                  | 0.006456921 |
| KEGG_PATHWAY    | hsa04730:Long-term depression                                     | 0.007414635 |
| KEGG_PATHWAY    | hsa04726:Serotonergic synapse                                     | 0.008247793 |
| KEGG_PATHWAY    | hsa04062:Chemokine signaling pathway                              | 0.009438543 |
| KEGG_PATHWAY    | hsa04620:Toll-like receptor signaling pathway                     | 0.012736587 |
| KEGG_PATHWAY    | hsa04550:Signaling pathways regulating pluripotency of stem cells | 0.017052239 |
| KEGG_PATHWAY    | hsa04931:Insulin resistance                                       | 0.017449992 |
| KEGG_PATHWAY    | hsa04270:Vascular smooth muscle contraction                       | 0.020614883 |
| KEGG_PATHWAY    | hsa05152:Tuberculosis                                             | 0.024667099 |
| KEGG_PATHWAY    | hsa04974:Protein digestion and absorption                         | 0.028504903 |
| KEGG_PATHWAY    | hsa04540:Gap junction                                             | 0.028504903 |

|              |                                              |             |
|--------------|----------------------------------------------|-------------|
| KEGG_PATHWAY | hsa04066:HIF-1 signaling pathway             | 0.030366818 |
| KEGG_PATHWAY | hsa04925:Aldosterone synthesis and secretion | 0.0309291   |
| KEGG_PATHWAY | hsa05161:Hepatitis B                         | 0.032491895 |

### Erlotinib treatment

| Category     | Term                                               | FDR         |
|--------------|----------------------------------------------------|-------------|
| KEGG_PATHWAY | hsa04740:Olfactory transduction                    | 1.15E-51    |
| KEGG_PATHWAY | hsa04060:Cytokine-cytokine receptor interaction    | 9.34E-20    |
| KEGG_PATHWAY | hsa04080:Neuroactive ligand-receptor interaction   | 1.44E-13    |
| KEGG_PATHWAY | hsa04630:Jak-STAT signaling pathway                | 1.44E-13    |
| KEGG_PATHWAY | hsa05160:Hepatitis C                               | 4.02E-08    |
| KEGG_PATHWAY | hsa05032:Morphine addiction                        | 1.02E-07    |
| KEGG_PATHWAY | hsa04151:PI3K-Akt signaling pathway                | 1.43E-07    |
| KEGG_PATHWAY | hsa04973:Carbohydrate digestion and absorption     | 6.58E-07    |
| KEGG_PATHWAY | hsa04062:Chemokine signaling pathway               | 9.91E-07    |
| KEGG_PATHWAY | hsa04024:cAMP signaling pathway                    | 2.50E-06    |
| KEGG_PATHWAY | hsa05230:Central carbon metabolism in cancer       | 1.48E-05    |
| KEGG_PATHWAY | hsa04620:Toll-like receptor signaling pathway      | 1.09E-04    |
| KEGG_PATHWAY | hsa05162:Measles                                   | 1.43E-04    |
| KEGG_PATHWAY | hsa05161:Hepatitis B                               | 3.68E-04    |
| KEGG_PATHWAY | hsa05200:Pathways in cancer                        | 5.02E-04    |
| KEGG_PATHWAY | hsa04650:Natural killer cell mediated cytotoxicity | 0.002476769 |
| KEGG_PATHWAY | hsa05033:Nicotine addiction                        | 0.005561919 |
| KEGG_PATHWAY | hsa04723:Retrograde endocannabinoid signaling      | 0.007079329 |
| KEGG_PATHWAY | hsa04380:Osteoclast differentiation                | 0.010791786 |
| KEGG_PATHWAY | hsa04727:GABAergic synapse                         | 0.014314665 |
| KEGG_PATHWAY | hsa04514:Cell adhesion molecules (CAMs)            | 0.0189606   |
| KEGG_PATHWAY | hsa04660:T cell receptor signaling pathway         | 0.019722166 |
| KEGG_PATHWAY | hsa04724:Glutamatergic synapse                     | 0.020545074 |
| KEGG_PATHWAY | hsa04014:Ras signaling pathway                     | 0.021988436 |
| KEGG_PATHWAY | hsa04725:Cholinergic synapse                       | 0.038832011 |
| KEGG_PATHWAY | hsa04917:Prolactin signaling pathway               | 0.041610124 |
| KEGG_PATHWAY | hsa04022:cGMP-PKG signaling pathway                | 0.042262923 |

### Roscovitine treatment

| Category     | Term                                             | FDR      |
|--------------|--------------------------------------------------|----------|
| KEGG_PATHWAY | hsa04080:Neuroactive ligand-receptor interaction | 1.29E-35 |
| KEGG_PATHWAY | hsa04024:cAMP signaling pathway                  | 3.01E-16 |
| KEGG_PATHWAY | hsa04151:PI3K-Akt signaling pathway              | 6.03E-15 |
| KEGG_PATHWAY | hsa04014:Ras signaling pathway                   | 3.24E-10 |
| KEGG_PATHWAY | hsa04015:Rap1 signaling pathway                  | 2.53E-09 |
| KEGG_PATHWAY | hsa04020:Calcium signaling pathway               | 7.99E-09 |
| KEGG_PATHWAY | hsa04724:Glutamatergic synapse                   | 2.25E-08 |

|              |                                                                   |          |
|--------------|-------------------------------------------------------------------|----------|
| KEGG_PATHWAY | hsa04630:Jak-STAT signaling pathway                               | 6.37E-08 |
| KEGG_PATHWAY | hsa05032:Morphine addiction                                       | 1.17E-06 |
| KEGG_PATHWAY | hsa05033:Nicotine addiction                                       | 7.75E-05 |
| KEGG_PATHWAY | hsa04010:MAPK signaling pathway                                   | 1.22E-04 |
| KEGG_PATHWAY | hsa05030:Cocaine addiction                                        | 1.49E-04 |
| KEGG_PATHWAY | hsa04022:cGMP-PKG signaling pathway                               | 1.91E-04 |
| KEGG_PATHWAY | hsa04950:Maturity onset diabetes of the young                     | 4.43E-04 |
| KEGG_PATHWAY | hsa04060:Cytokine-cytokine receptor interaction                   | 4.51E-04 |
| KEGG_PATHWAY | hsa04810:Regulation of actin cytoskeleton                         | 5.23E-04 |
| KEGG_PATHWAY | hsa04921:Oxytocin signaling pathway                               | 9.92E-04 |
| KEGG_PATHWAY | hsa04640:Hematopoietic cell lineage                               | 0.002553 |
| KEGG_PATHWAY | hsa04713:Circadian entrainment                                    | 0.008991 |
| KEGG_PATHWAY | hsa04728:Dopaminergic synapse                                     | 0.012143 |
| KEGG_PATHWAY | hsa04550:Signaling pathways regulating pluripotency of stem cells | 0.013973 |
| KEGG_PATHWAY | hsa05200:Pathways in cancer                                       | 0.018766 |
| KEGG_PATHWAY | hsa05031:Amphetamine addiction                                    | 0.03787  |
| KEGG_PATHWAY | hsa04261:Adrenergic signaling in cardiomyocytes                   | 0.037945 |
| KEGG_PATHWAY | hsa04970:Salivary secretion                                       | 0.042805 |

---

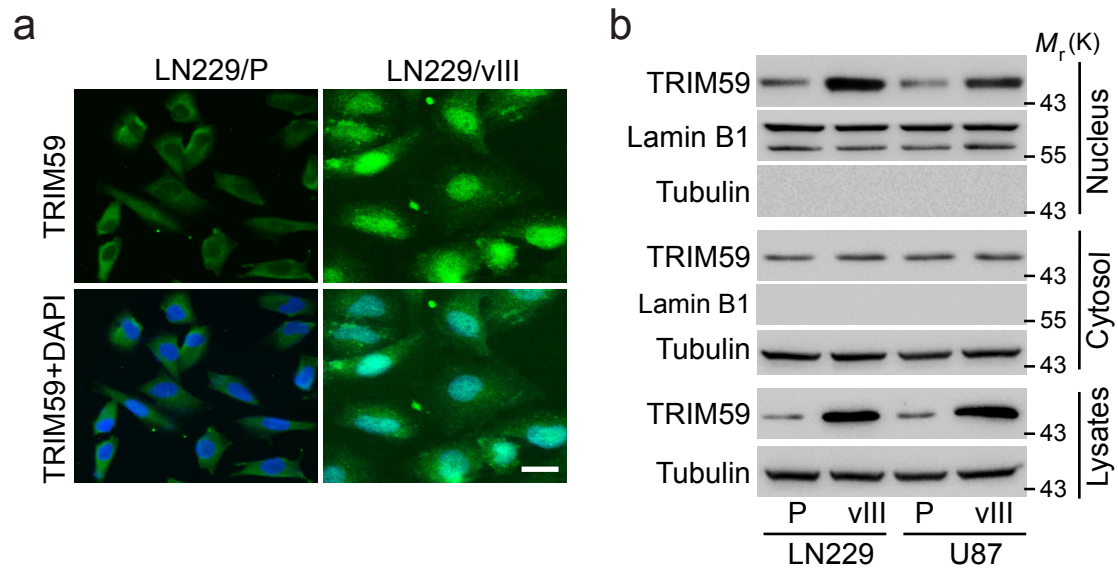

**Supplementary Figure 1 Effect of EGF stimulation on TRIM59 protein stability**

- a. IF analysis of TRIM59 nuclear translocation in LN229 GBM cells with or without EGFRvIII expression. P, parental. vIII, EGFRvIII. Scale bars, 40  $\mu$ M.
- b. WB for TRIM59 in LN229 and U87 GBM cells with or without EGFRvIII expression. Data are representative of three independent experiments with similar results.

a

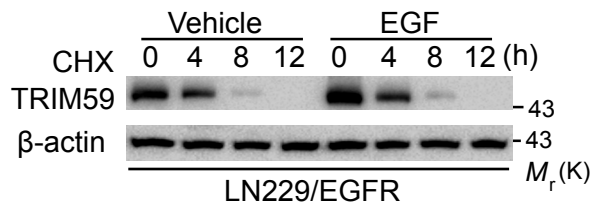

b

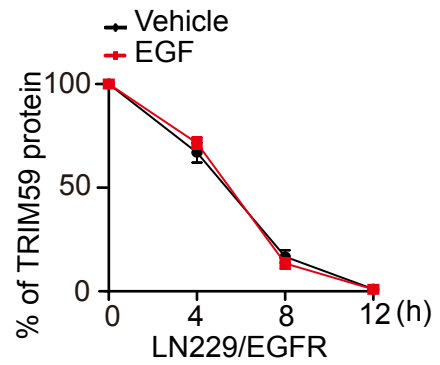

**Supplementary Figure 2 Effect of EGF stimulation on TRIM59 protein stability**

a. WB assays of effects of EGF treatment on TRIM59 protein levels in LN229/EGFR cells. After stimulation with EGF (100 ng/ml) for 6 h, cells were treated with cycloheximide (CHX, 20 mg/ml) for the indicated time points.

b. Quantification of TRIM59 protein levels in a.

Data are representative of three independent experiments with similar results. Source data are provided as a Source Data file.

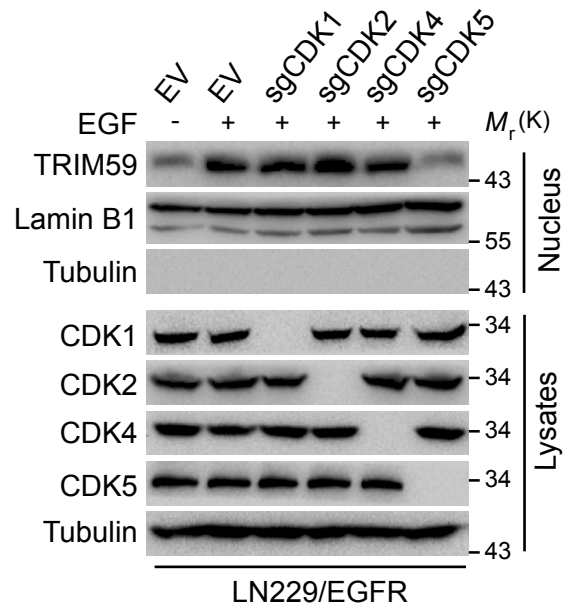

**Supplementary Figure 3 Effects of CDK1, CDK2, CDK4 or CDK5 knockout on TRIM59 nuclear localization**

WB assays of effects of CDKs knockout on TRIM59 nuclear translocation in LN229/EGFR cells with or without EGF (100 ng/ml) stimulation for 6 h. Data are representative of three independent experiments with similar results.

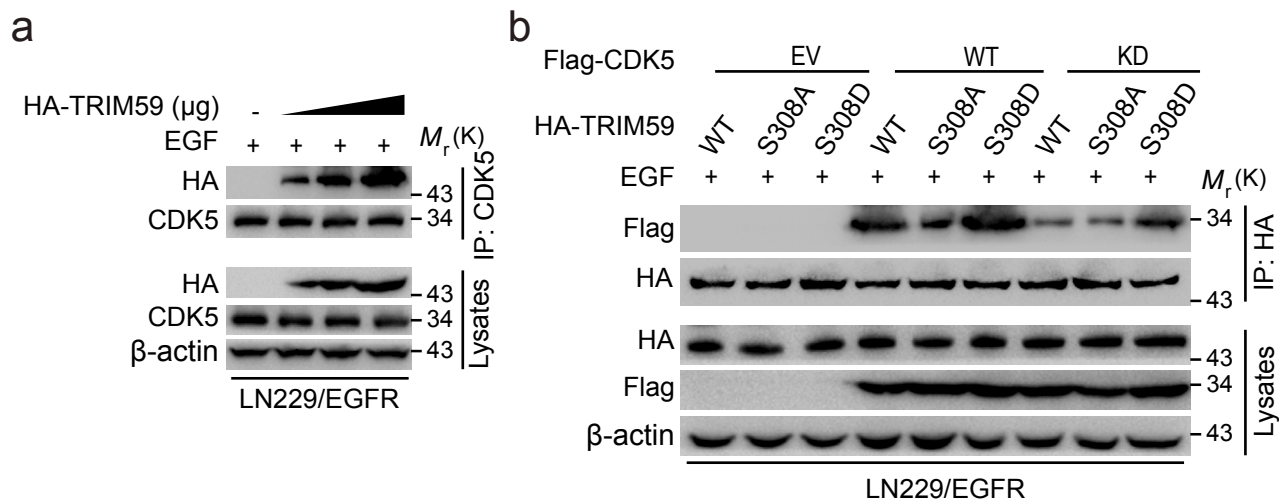

**Supplementary Figure 4 Effects of elevated TRIM59 expression or CDK5 kinase activity on CDK5-TRIM59 interaction**

a. IP and WB for TRIM59 binding to CDK5 in LN229/EGFR cells transfected with increasing amounts of TRIM59 with EGF stimulation.

b. Effects of ectopic expression of TRIM59 WT, S308A, or S308D mutant on TRIM59 association with CDK5 WT or KD mutant with EGF stimulation.

Data are representative of three independent experiments with similar results.

a

CDK5 consensus motif (S/T) PX (K/H/R)

T144: AYLKEKD<sup>\*</sup>TPQKLLEQ

S246: TISLQEE<sup>\*</sup>SPLKFLEK

S308: LIPKMKI<sup>\*</sup>SPKRMSCS

b

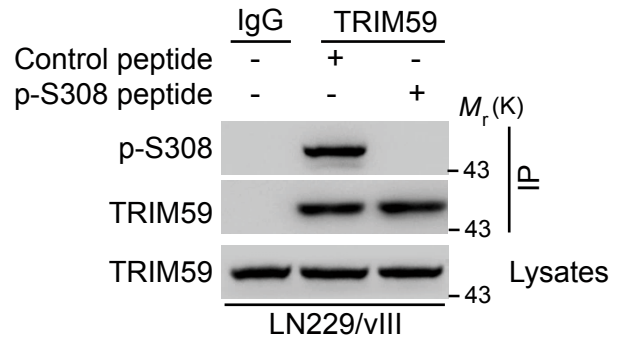

c

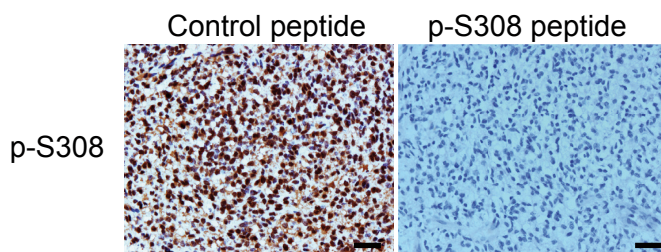

d

S308

Human LIPKMKI<sup>\*</sup>SPKRMSCS

Chimpanzee LIPKMKI<sup>\*</sup>SPKRMSCS

Monkey LIPKMKI<sup>\*</sup>SPKRMPEY

Pig LIPEMKI<sup>\*</sup>SSKRMPCS

Horse LIPEMKI<sup>\*</sup>SSKRMSCS

Dog LIPEMKI<sup>\*</sup>SSKRMPCS

Bovine LIPEMKI<sup>\*</sup>SSKRIPCA

Mouse VIPEMRV<sup>\*</sup>SSKRTPCS

Rat VIPEMRI<sup>\*</sup>SSKRMPCS

### Supplementary Figure 5 Validation of the specificity of the anti-p-TRIM59<sup>S308</sup> antibody

- The amino acid sequences around the sites potentially targeted by CDK5 in TRIM59.
- IP and WB for TRIM59 phosphorylation in LN229/EGFRvIII GBM cells. A rabbit p-TRIM59<sup>S308</sup> was generated against a specific phospho-peptide containing p-S308. Before IP, agarose beads were pre-incubated with a control peptide or the specific phospho-peptide containing p-S308.
- IHC assays of a clinical GBM tumor tissue with the specific anti-p-TRIM59<sup>S308</sup> antibody in the presence of a control peptide or the specific phospho-peptide containing p-S308. IHC was performed twice on the GBM sample with the blocking peptide with similar results. Scale bar, 50 $\mu$ m.
- Amino acid sequences around S308 in TRIM59 among multiple species.



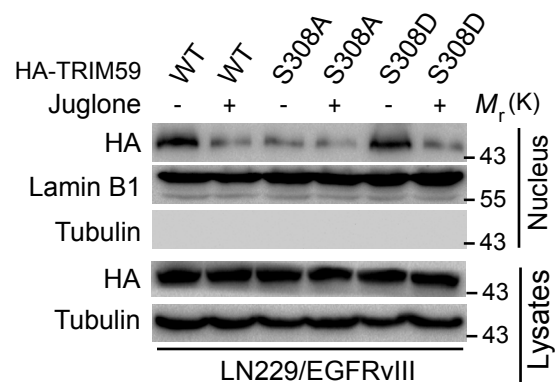

**Supplementary Figure 6 Effect of PIN1 inhibitor on TRIM59 nuclear translocation**

LN229/EGFRvIII GBM cells reconstituted with TRIM59 WT, S308A or S308D mutant were treated with or without PIN1 inhibitor Juglone (10  $\mu$ M) for 4 h. Data are representative of three independent experiments with similar results.

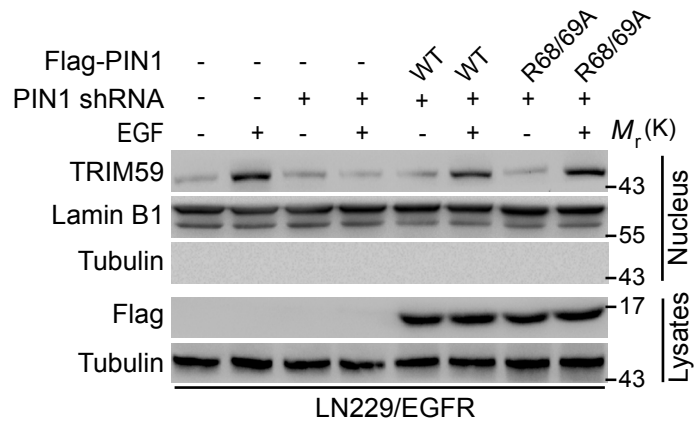

**Supplementary Figure 7 Effect of re-expression of PIN1 WT and R68/69A mutant on TRIM59 nuclear translocation**

LN229/EGFRvIII GBM cells reconstituted with empty vector (EV), shRNA resistant PIN1 WT, or R68/69A mutant were stimulated with or without EGF (100 ng/ml) for 6 h. Data are representative of three independent experiments with similar results.

**Supplementary Figure 8** Identification of macroH2A1 as a TRIM59 binding partner by LC-MS/MS analysis. Peptide sequences of macroH2A1 with seven independent tryptic peptides identified by LC-MS/MS analysis.

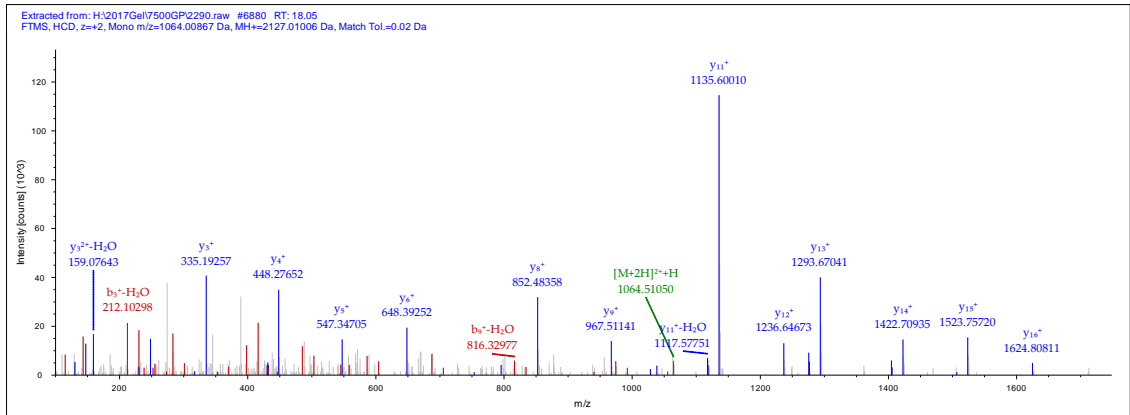

**Sequence #1: AASADTTEGTPADGFTVLSTK**

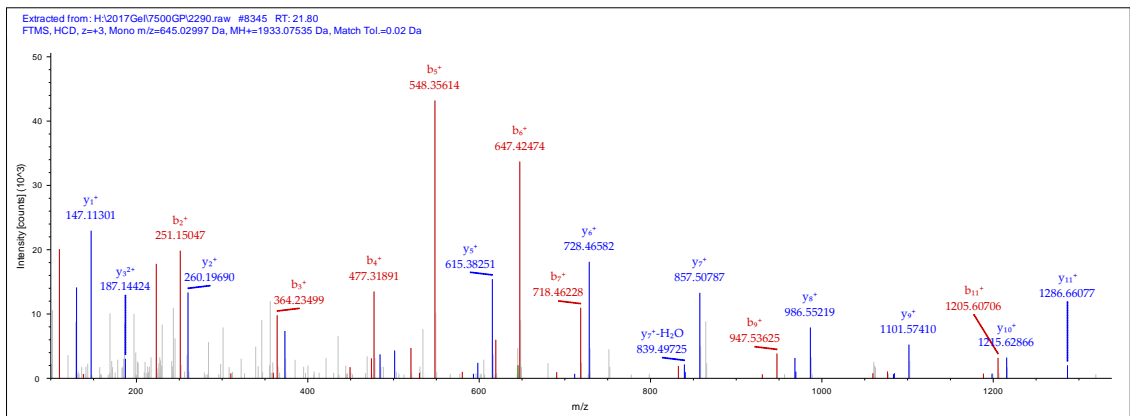

**Sequence #2: HILLAVANDEELNQLLK**

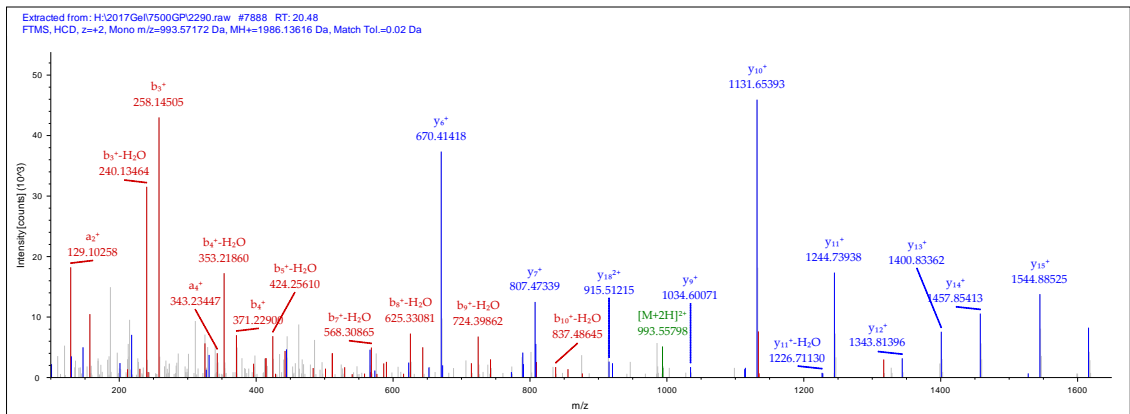

**Sequence #3: GVTIASGGVLPNIHPELLAK**

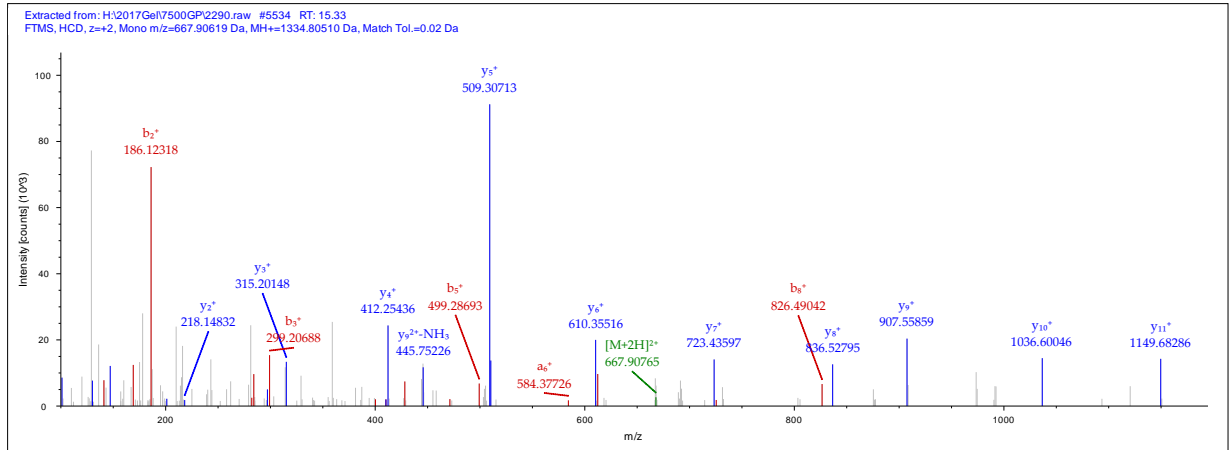

Sequence #4: GKLEAITPPPAK

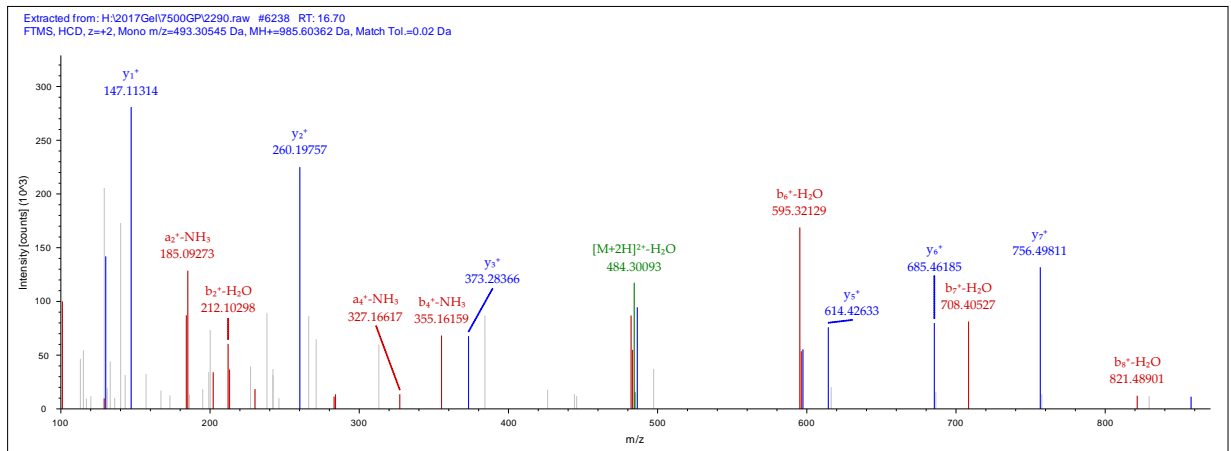

Sequence #5: QTAAQLILK

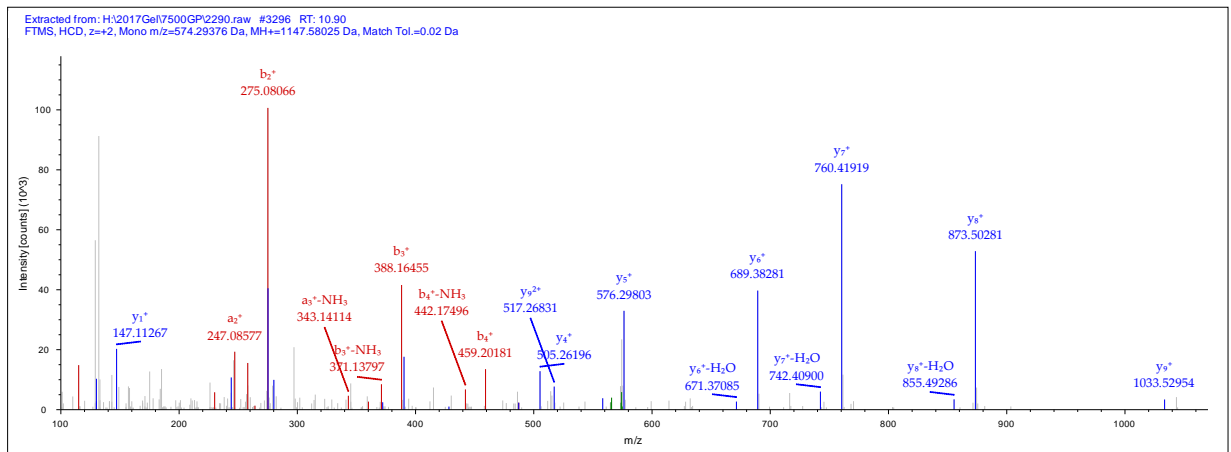

Sequence #6: NCLALADDDK

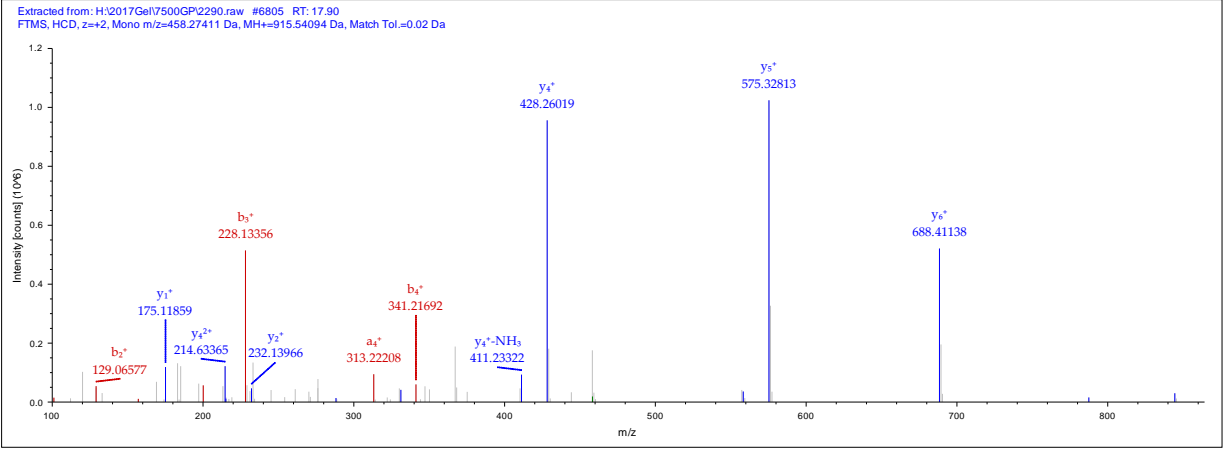

Sequence #7: AGVIFPVGR

**a**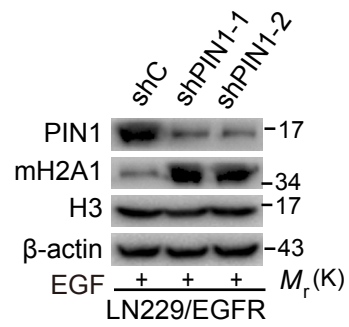**b**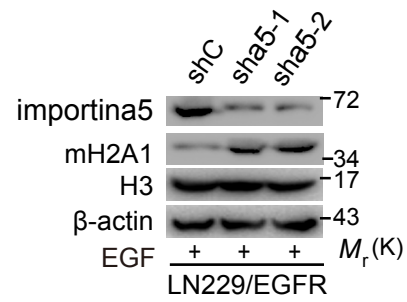**Supplementary Figure 9 Effects of PIN1 or importin  $\alpha$ 5 knockdown on the level of mH2A1 protein**

a and b. WB assay of effects of PIN1 or importin  $\alpha$ 5 knockdown on the level of mH2A1 protein in LN229/EGFR GBM cells with EGF stimulation. Data are representative of three independent experiments with similar results.

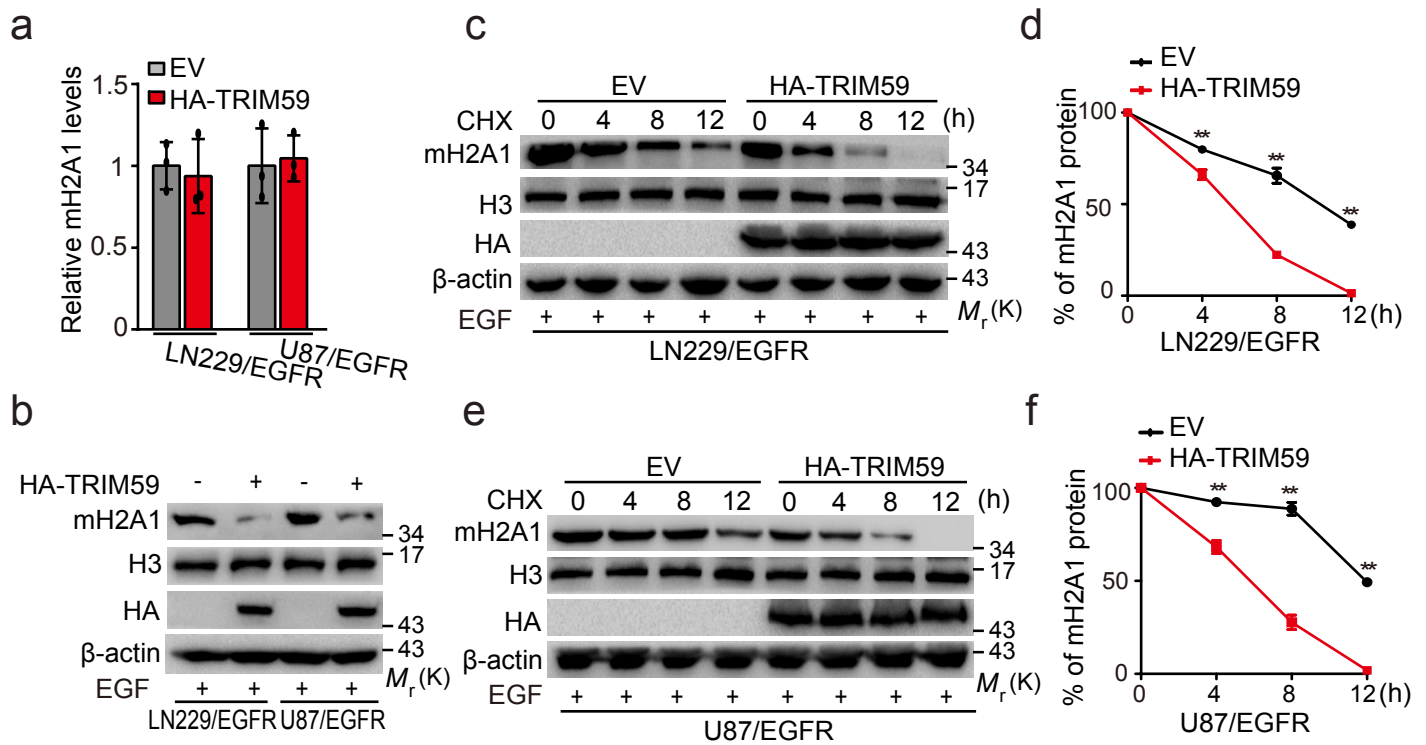

### Supplementary Figure 10 Ectopic expression of TRIM59 promotes macroH2A1 degradation

a and b. qRT-PCR and WB assays of effects of TRIM59 overexpression on macroH2A1 mRNA (a) and protein (b) levels in LN229/EGFR and U87/EGFR cells stimulated with EGF.

c and e. Effects of TRIM59 overexpression on macroH2A1 (mH2A1) stability in LN229/EGFR (c) and U87/EGFR (e) cells. After stimulation with EGF (100 ng/ml) for 6 h, cells were treated with cycloheximide (CHX, 20 mg/ml) for the indicated time points.

d and f. Quantification of mH2A1 protein levels in c and e, respectively.

Data are representative of three independent experiments with similar results. Data were expressed as means  $\pm$  SD.  $**P < 0.01$ , by two-tailed Student's *t* test. Source data are provided as a Source Data file.

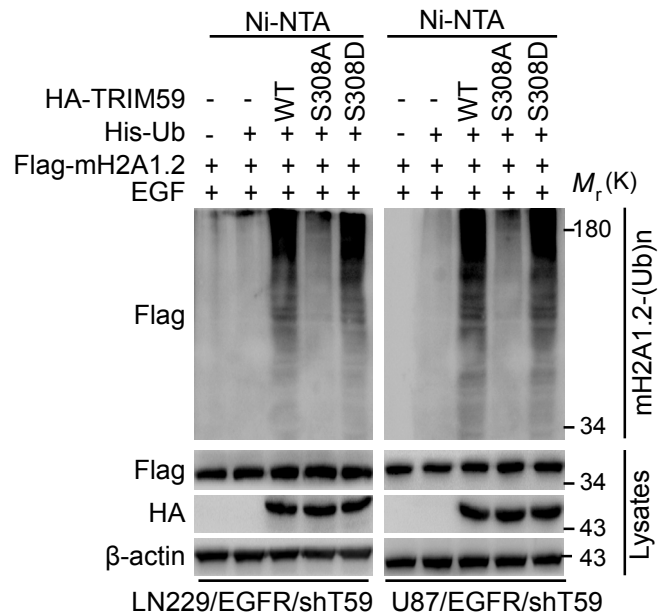

**Supplementary Figure 11 Effects of TRIM59 WT, S308A, or S308D mutant on mH2A1.2 ubiquitination**

Ubiquitination analysis. His-tagged ubiquitin (His-Ub) was co-transfected into LN229/EGFR/shTRIM59 and U87/EGFR/shTRIM59 cells with TRIM59 constructs or empty vector control. Various cells were stimulated with EGF (100ng/ml) for 6h. Data are representative of two independent experiments with similar results.



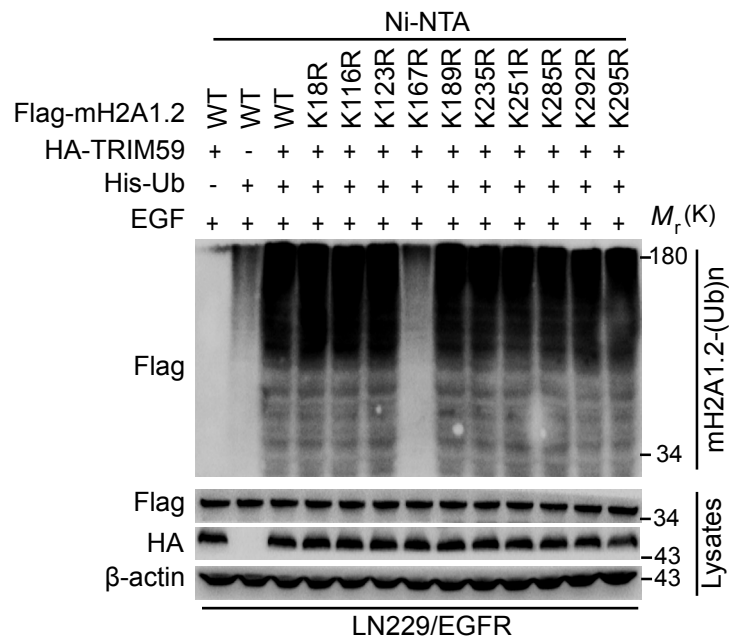

**Supplementary Figure 12 Effects of mH2A1 indicated ubiquitin mutants on mH2A1 ubiquitination by TRIM59**

His-tagged ubiquitin (His-Ub) was co-transfected into LN229/EGFR cells with TRIM59 and mH2A1 WT or K-to-R mutants with EGF (100ng/ml) stimulation for 6h. Data are representative of three independent experiments with similar results.

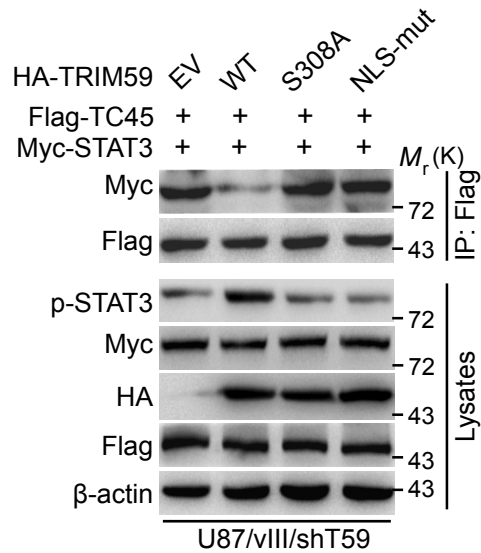

**Supplementary Figure 13 Effects of TRIM59, S308A, or NLS-mut mutant on the association between STAT3 and TC45**

IP and WB assay of effects of TRIM59 WT, S308A, or NLS-mut mutant on the association between STAT3 and TC45. Myc-tagged STAT3 was co-transfected with or without Flag-TC45, HA-TRIM59 WT, S308A, or NLS-mut mutant into U87/EGFRvIII GBM cells. Data are representative of three independent experiments with similar results.

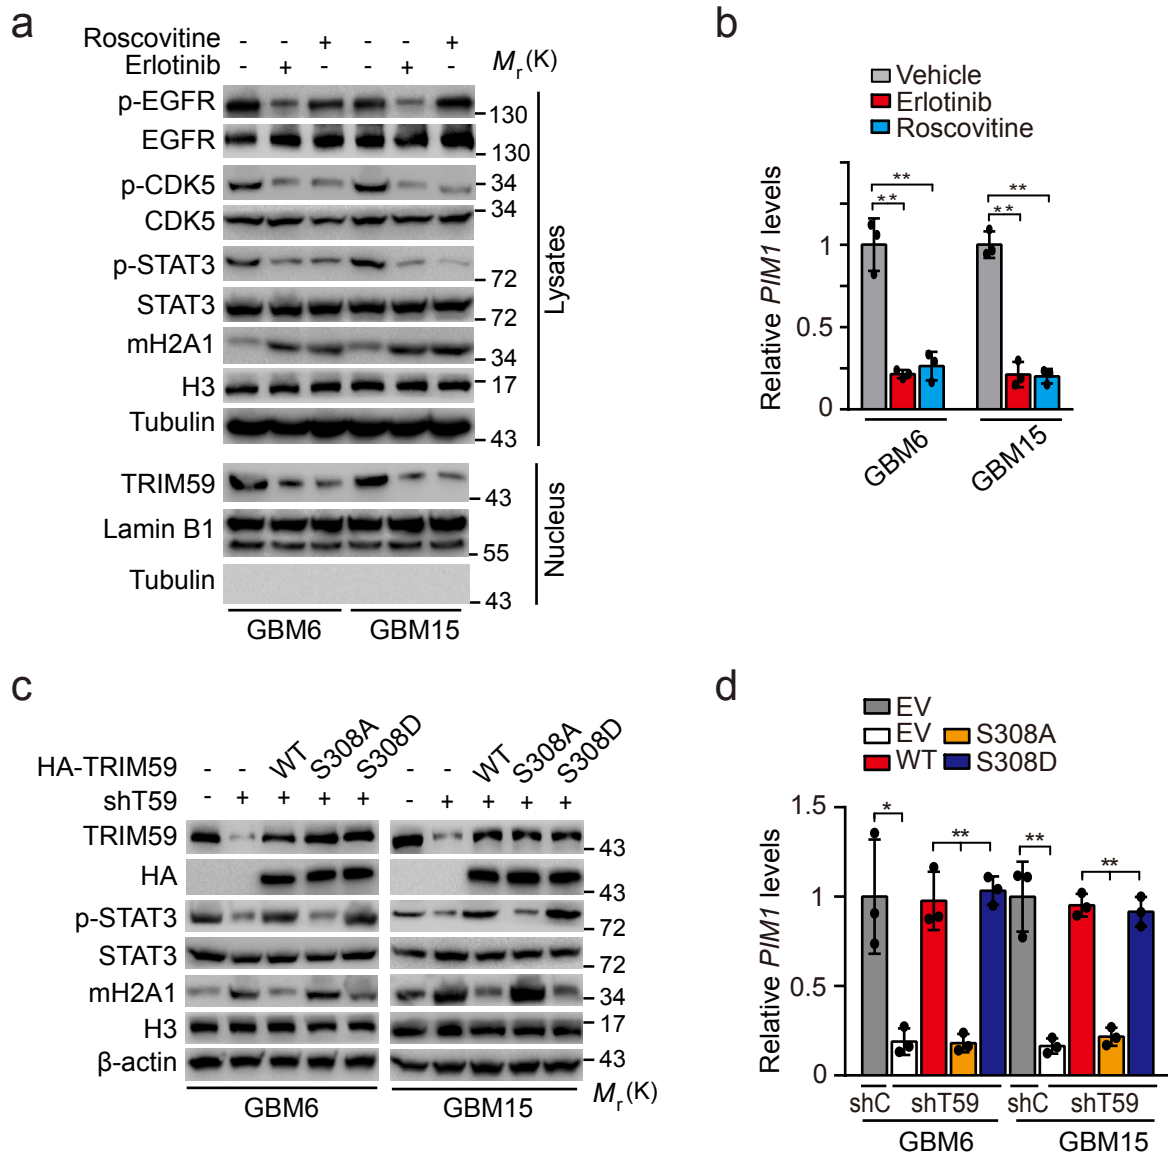

**Supplementary Figure 14 CDK5-dependent TRIM59 phosphorylation regulates STAT3 activity in patient-derived primary GBM cells**

a. Effects of EGFR inhibitor erlotinib or CDK5 inhibitor Roscovitine treatment on p-EGFR, p-CDK5, p-STAT3, and mH2A1 protein levels in GBM6 and GBM15 cells.

b. qRT-PCR analyses of erlotinib or Roscovitine treatment on STAT3 target gene *PIM1* mRNA expression.

c-d. Effects of TRIM59 shRNA knockdown and re-expression of shRNA-resistant TRIM59 WT, S308A, or S308D mutant on TRIM59, mH2A1 protein levels (c), p-STAT3 (c), STAT3 target gene *PIM1* expression (d) in GBM6 and GBM15 cells.

Data are representative of three independent experiments with similar results. Data were expressed as means  $\pm$  SD. \* $P$  < 0.05, \*\* $P$  < 0.01, by two-tailed Student's *t* test. Source data are provided as a Source Data file.

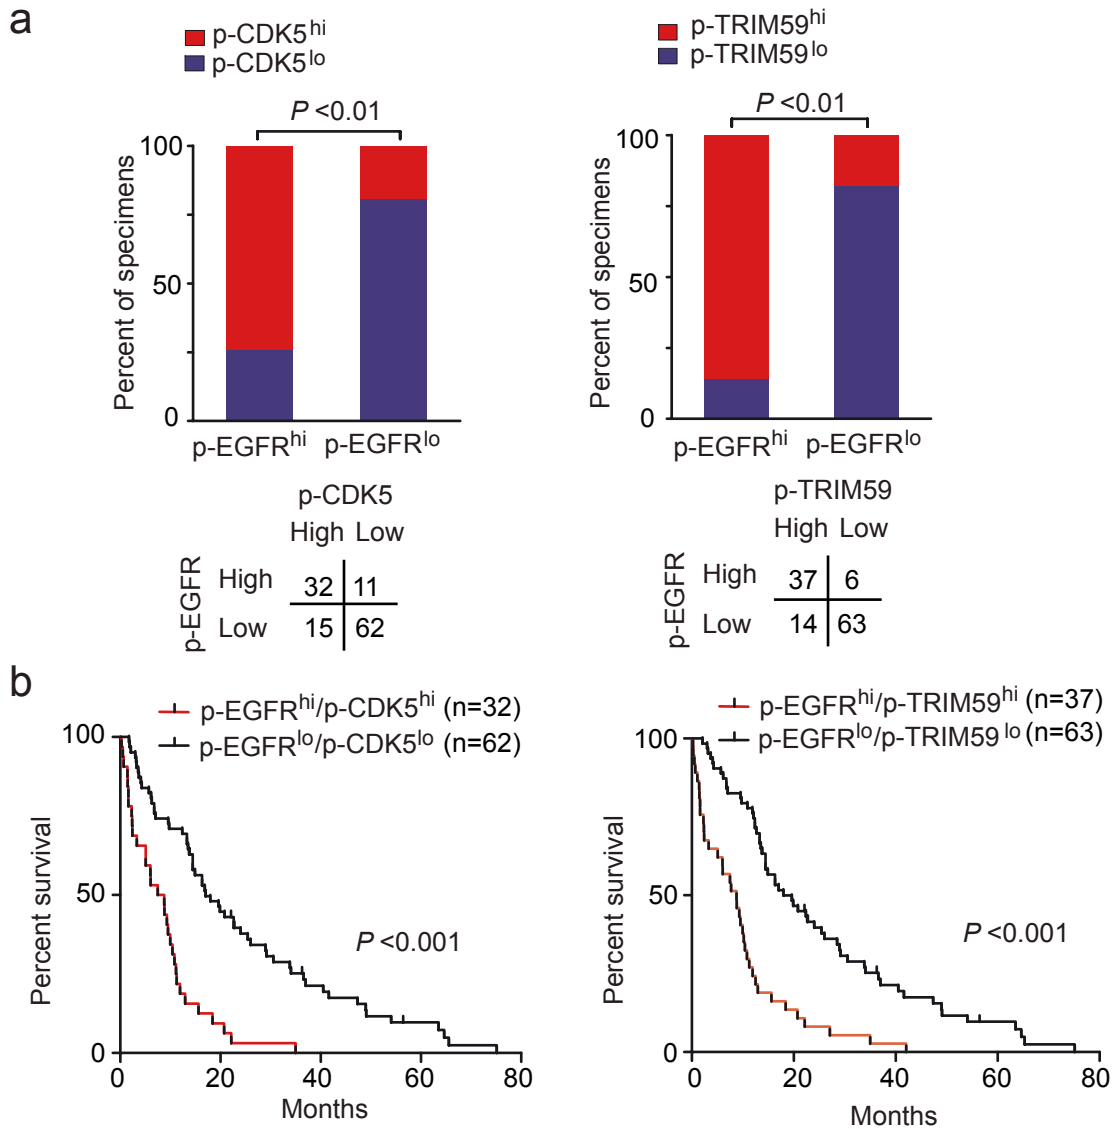

**Supplementary Figure 15 Levels of p-EGFR correlate with p-CDK5 and p-TRIM59<sup>S308</sup> in clinical GBM specimens**

a. Correlation of expression between p-EGFR<sup>Y1173</sup> with p-CDK5<sup>Y15</sup> and p-TRIM59<sup>S308</sup> in Figure 8A.

b. Kaplan-Meier survival analysis of GBM patients with tumors expressing indicated proteins. Median survival (in months): p-EGFR<sup>hi</sup>/p-CDK5<sup>hi</sup>, 8.12; p-EGFR<sup>lo</sup>/p-CDK5<sup>lo</sup>, 17.03; p-EGFR<sup>hi</sup>/p-TRIM59<sup>hi</sup>, 8.77; p-EGFR<sup>lo</sup>/p-TRIM59<sup>lo</sup>, 17.97. Statistical analysis was performed by log-rank test. Source data are provided as a Source Data file.

Figure 1B

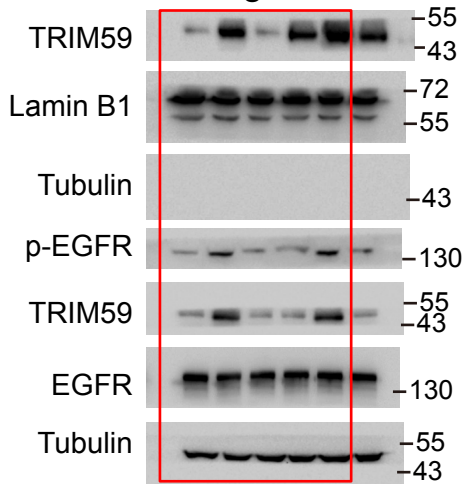

Figure 1C

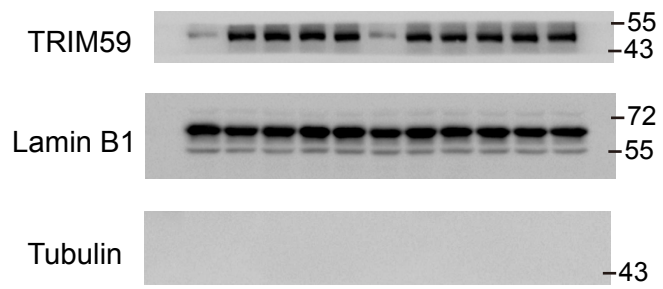

Figure 1E

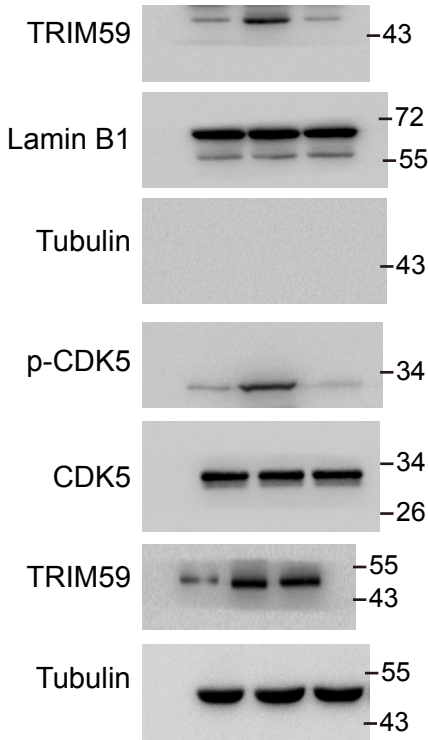

Figure 1F

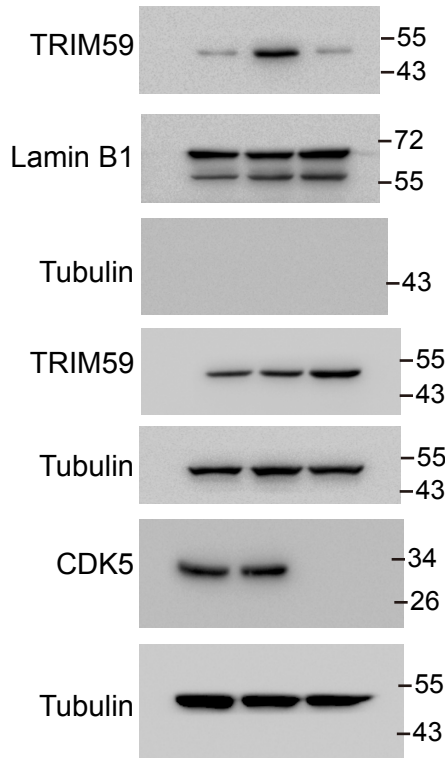

Figure 1G

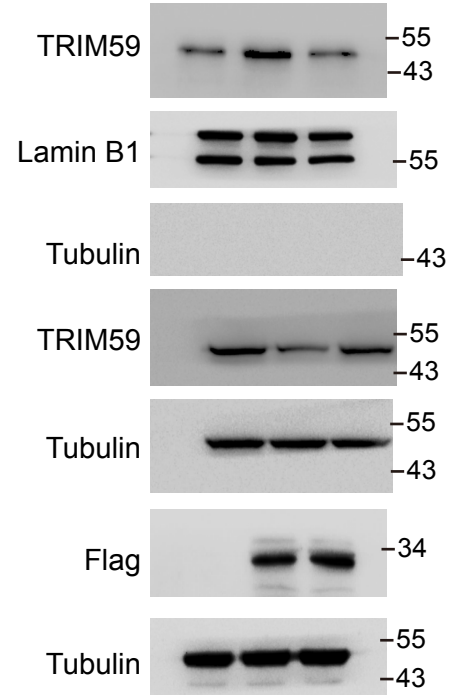

Figure 2A

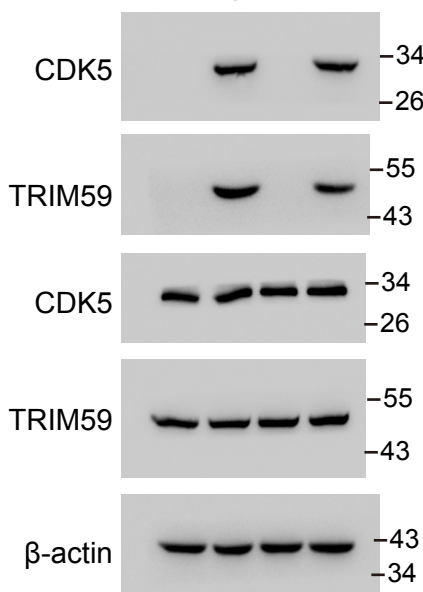

Figure 2B

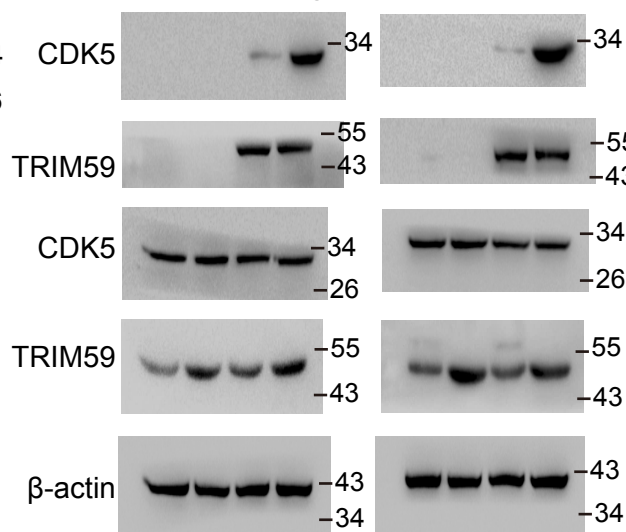

Figure 2C

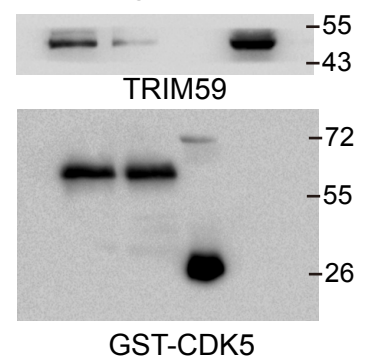

**Figure 2E**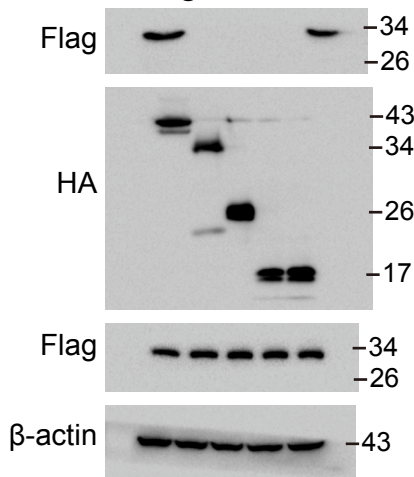**Figure 2F**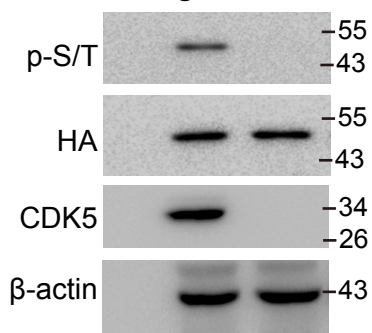**Figure 2G**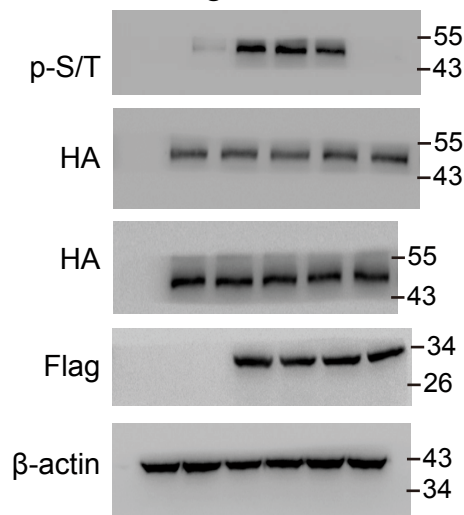**Figure 2H**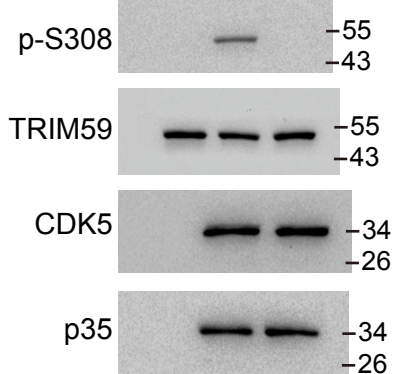**Figure 2I**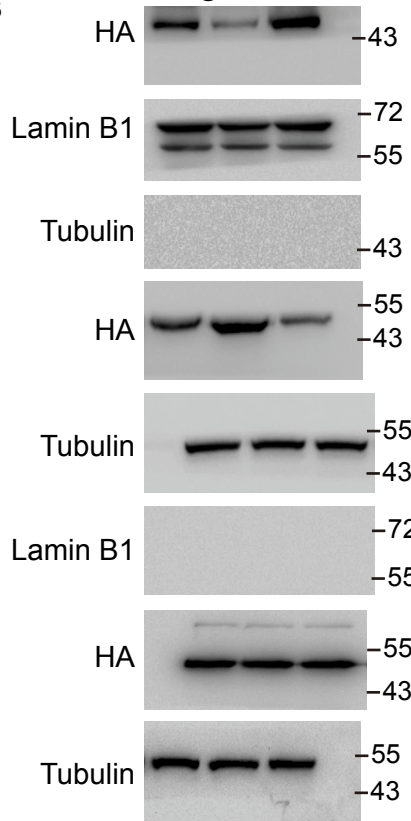**Figure 3A**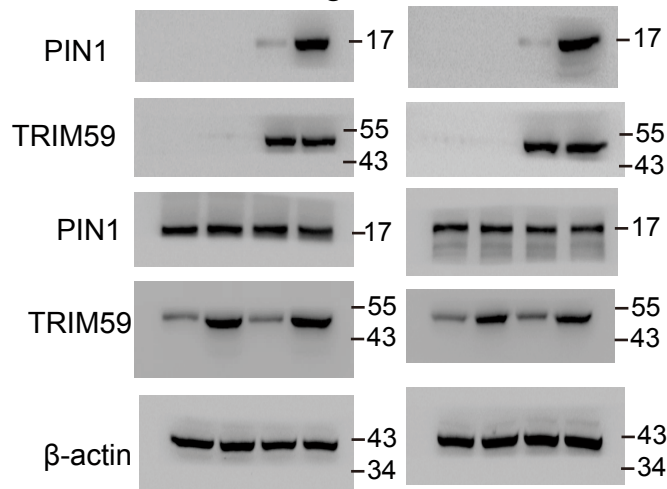**Figure 3B**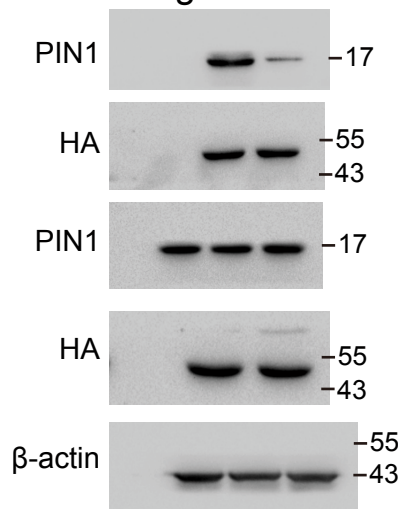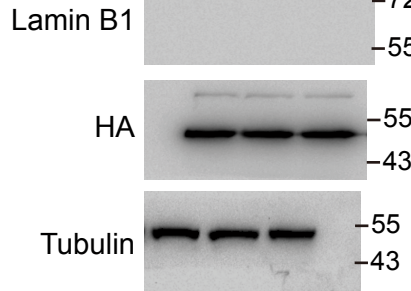**Figure 3C**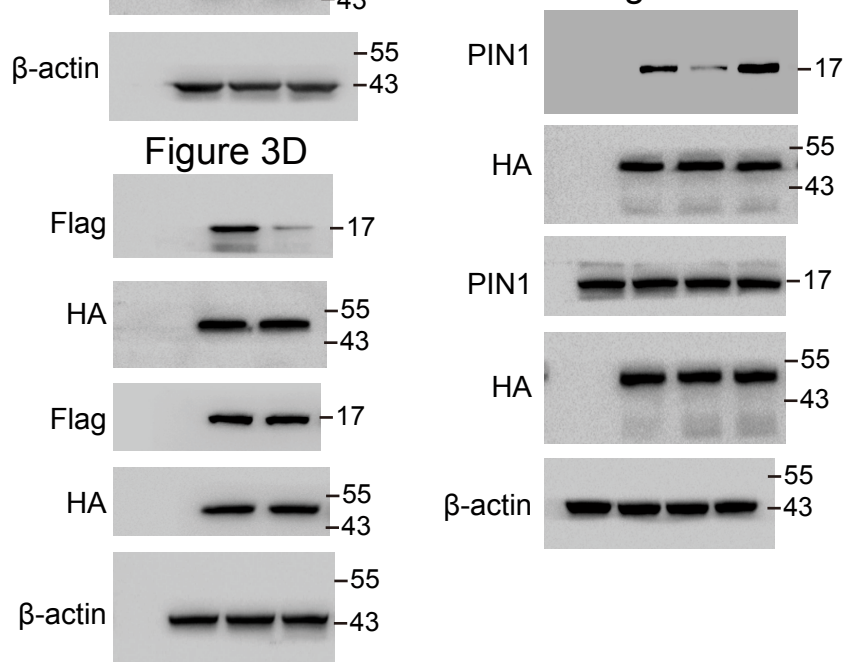**Figure 3D**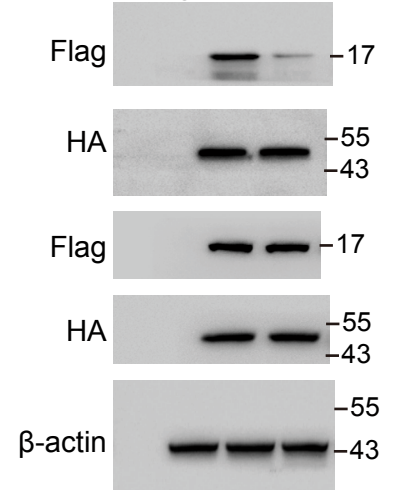**Figure 3F**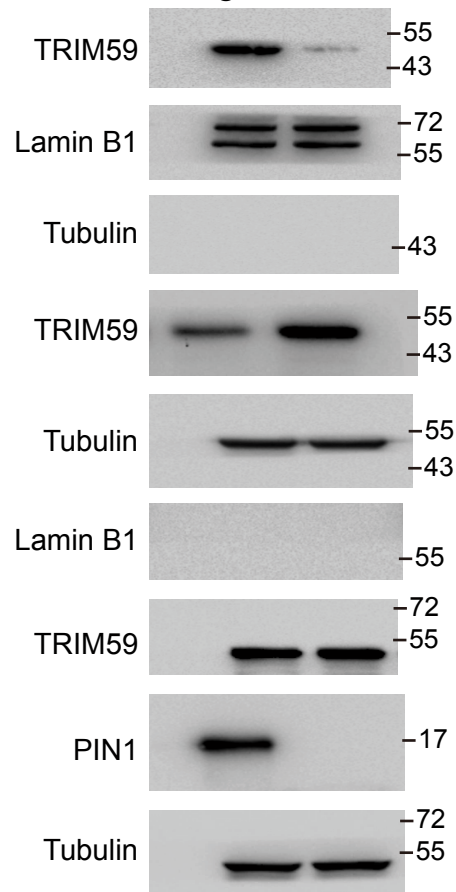

Figure 3G

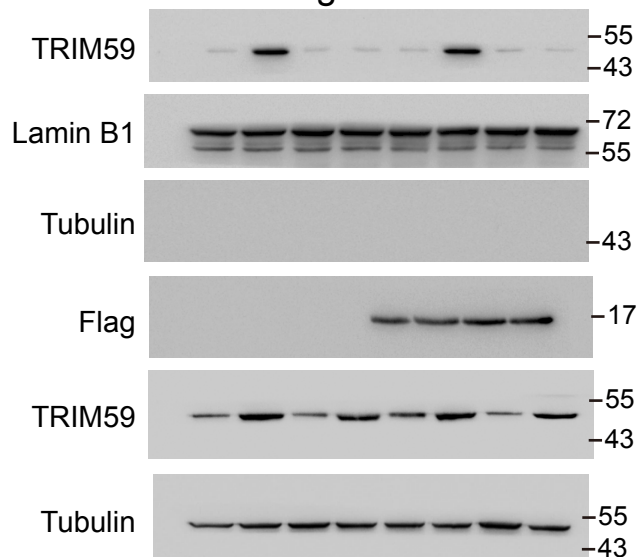

Figure 4C

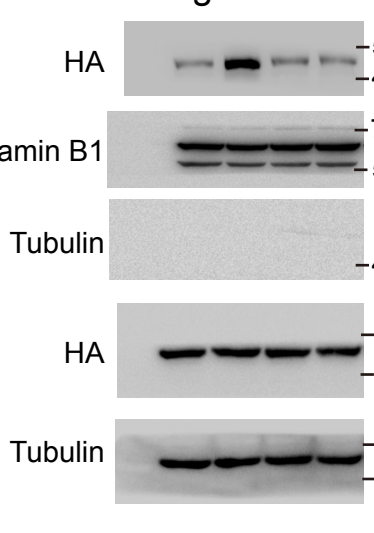

Figure 4D

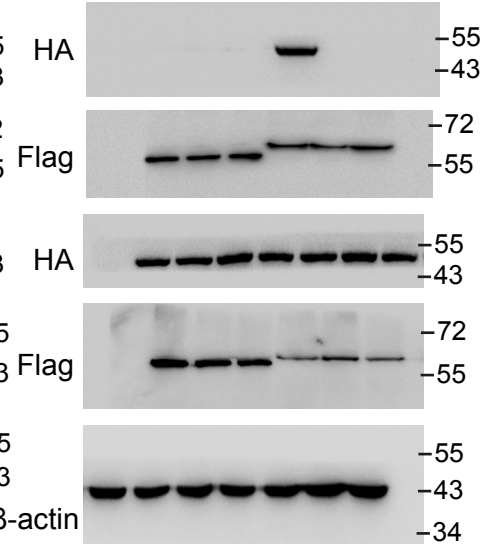

Figure 4E

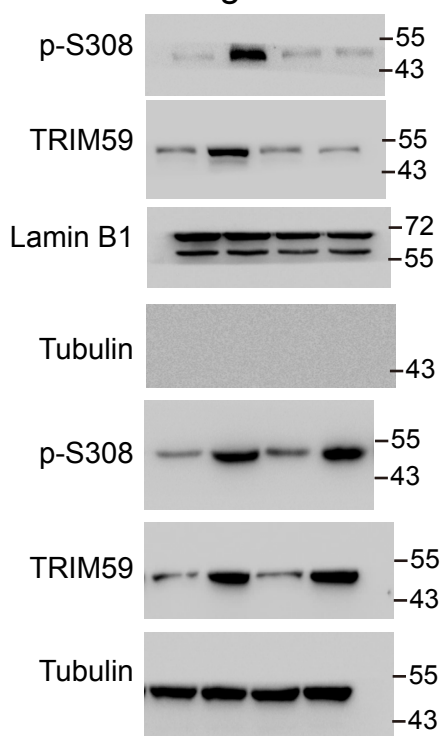

Figure 4F

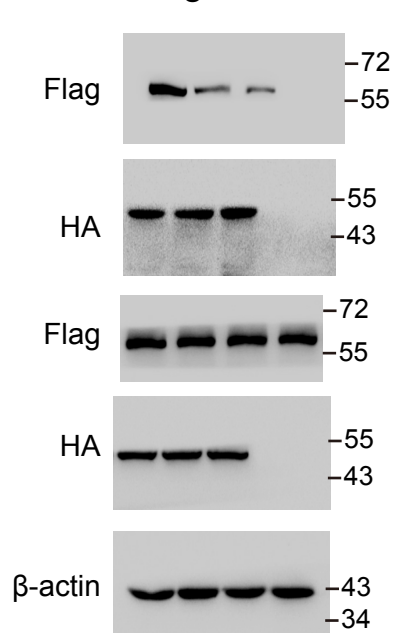

Figure 4G

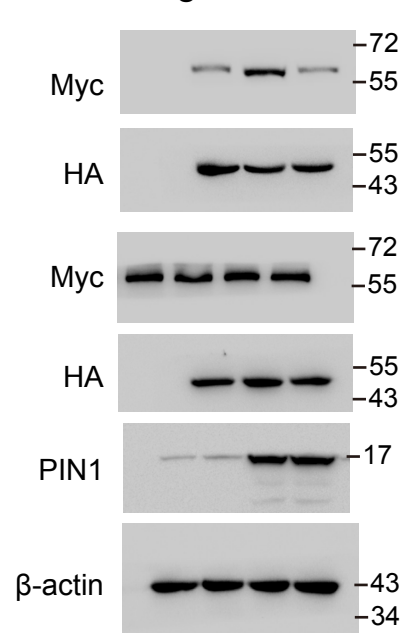

Figure 5B

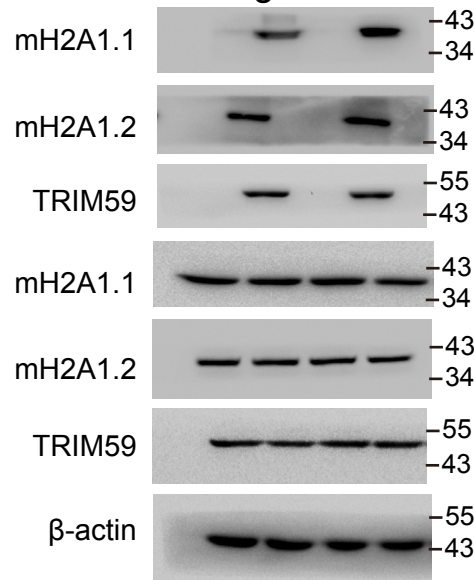

Figure 5D

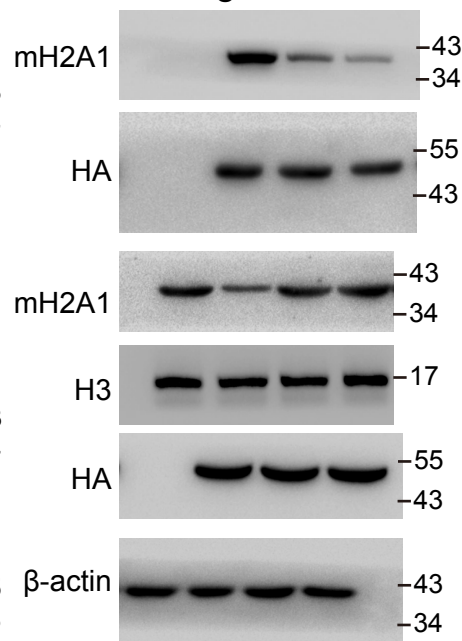

Figure 6A

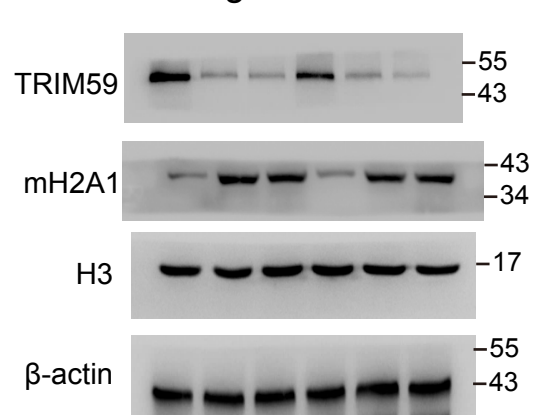

Figure 6C

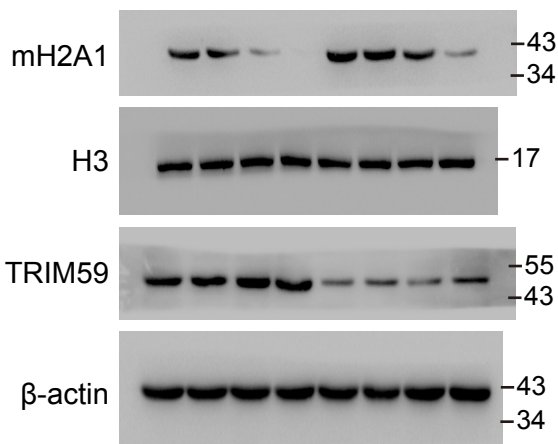

Figure 6E

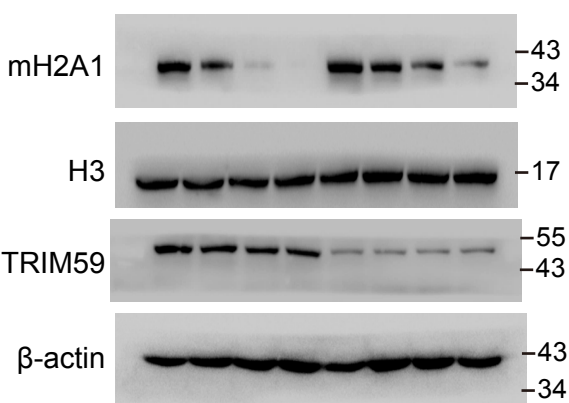

Figure 6I

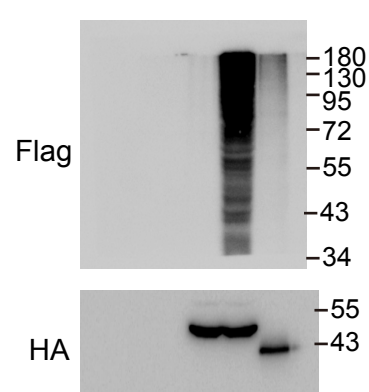

Figure 6G

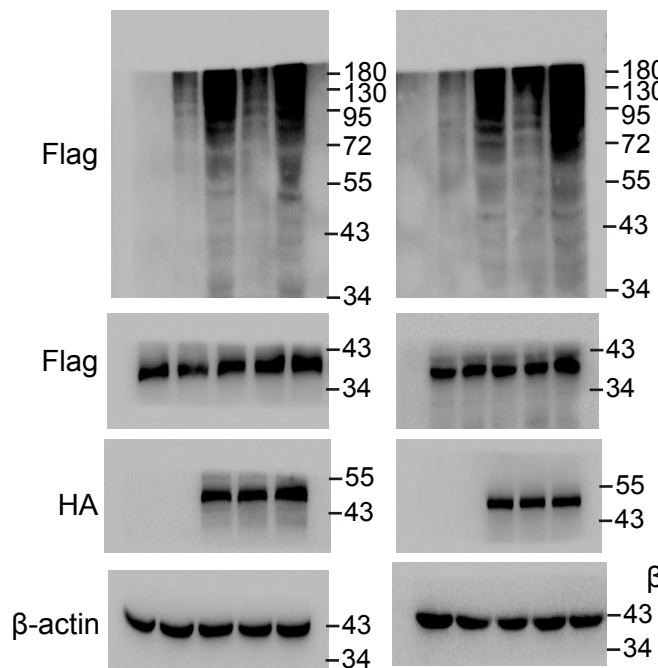

Figure 6H

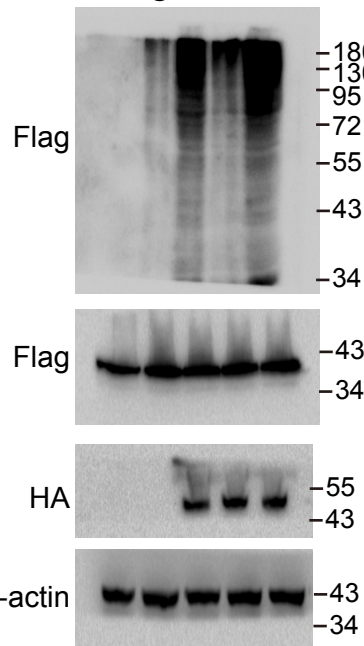

Figure 7F

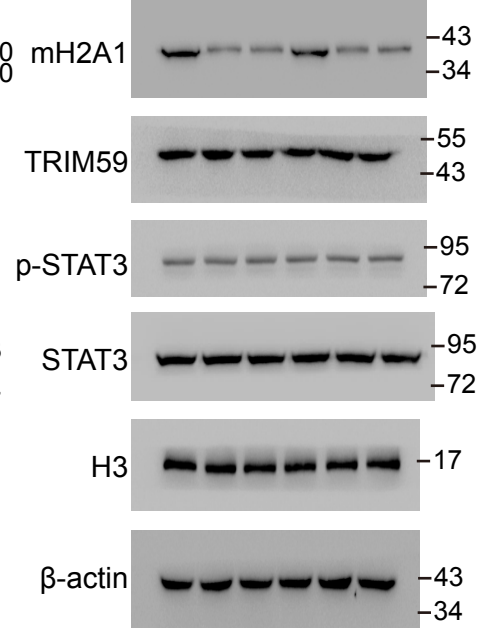

Figure 7I

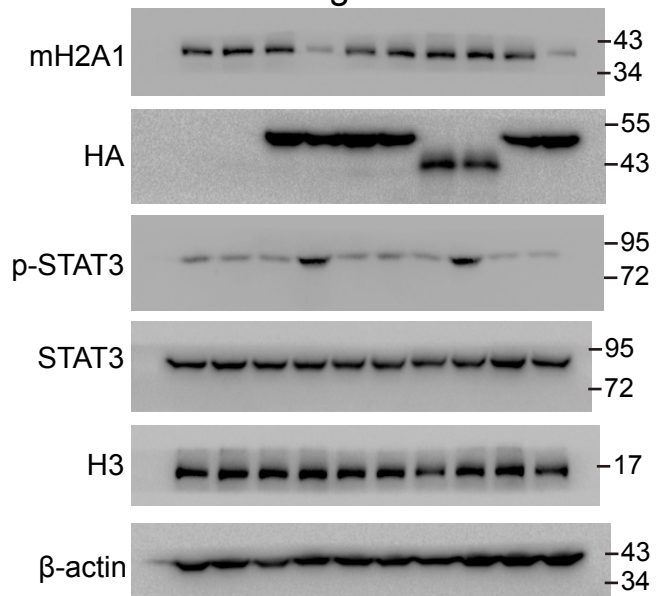

Figure 8A

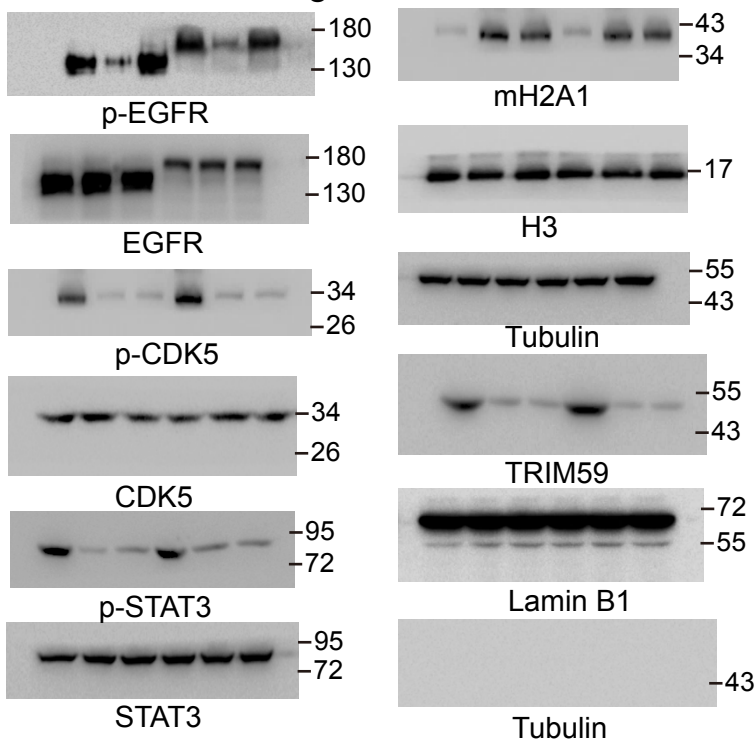



Figure 8D

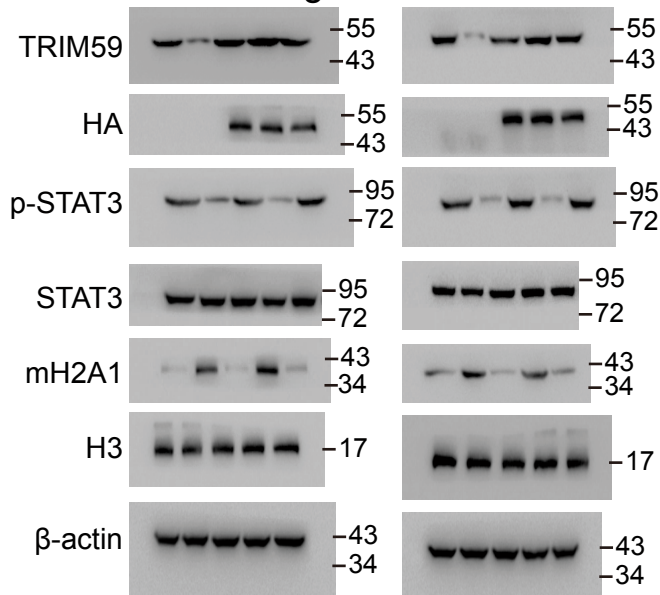

Figure 8J

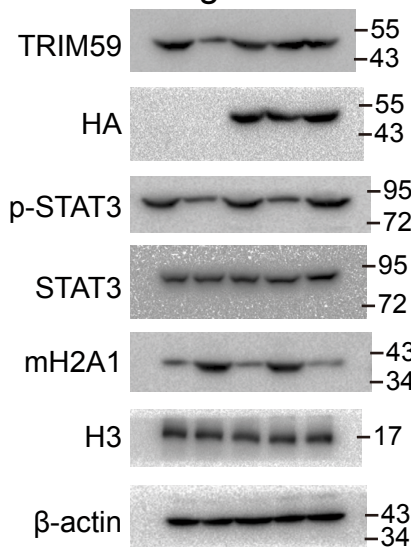

Figure S1B

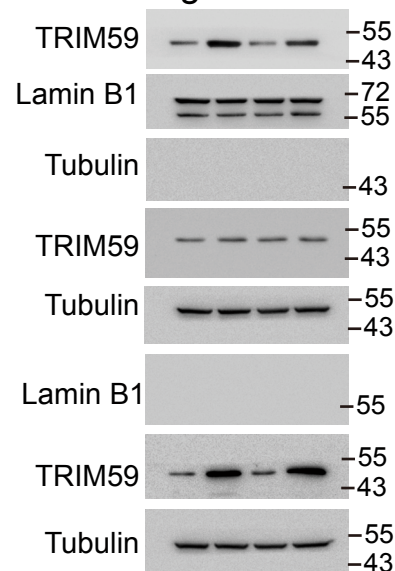

Figure S4B

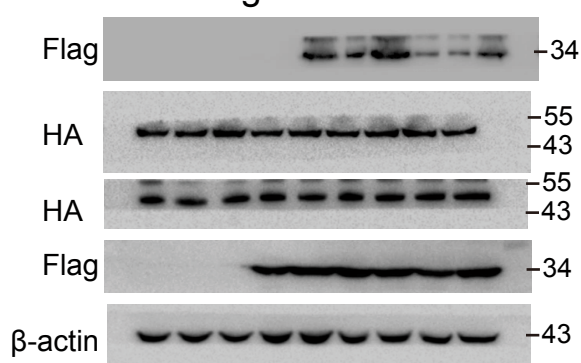

Figure S2A

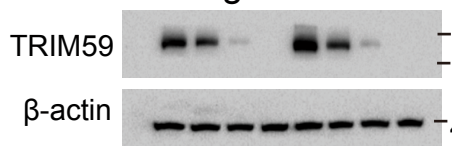

Figure S3

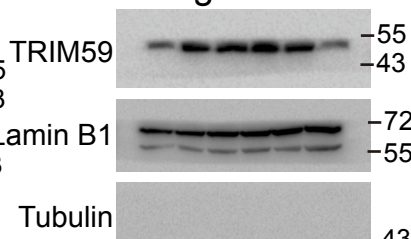

Figure S4A

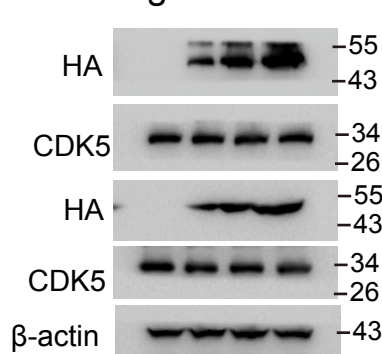

Tubulin

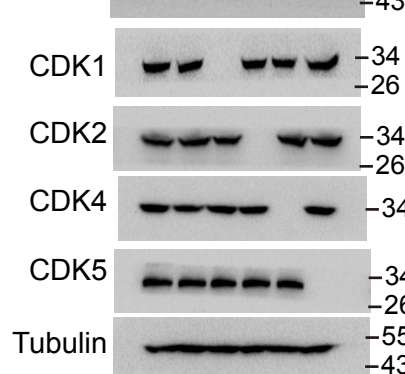

Figure S5B

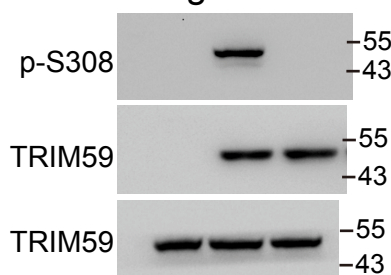

Figure S6

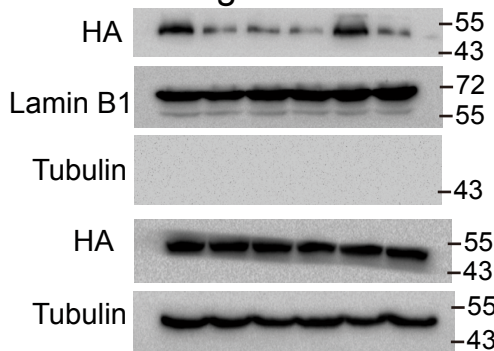

Figure S7

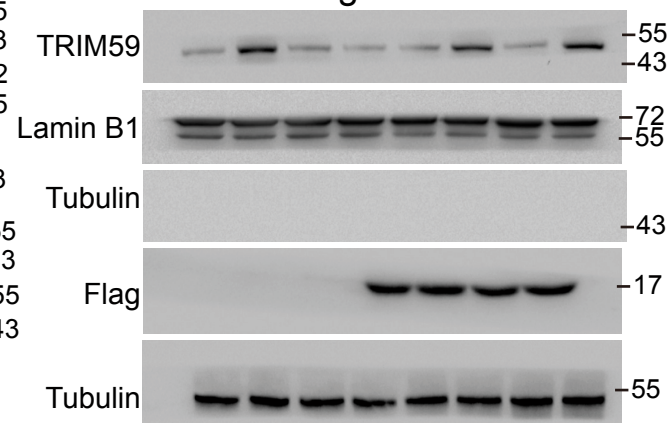

Figure S9A

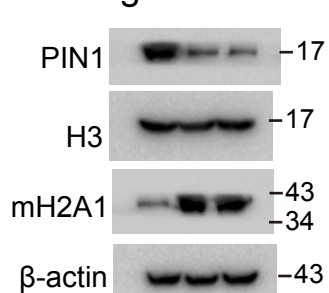

Figure S9B

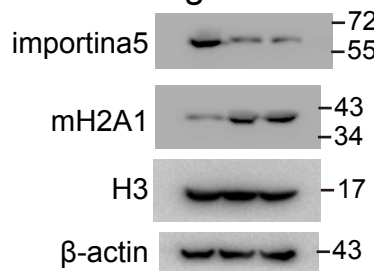

Figure S10B

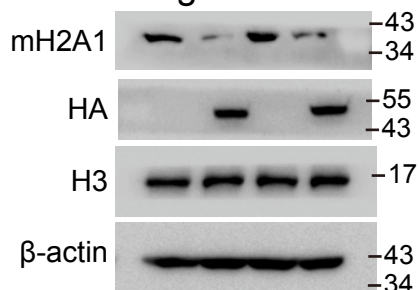

Figure S10C

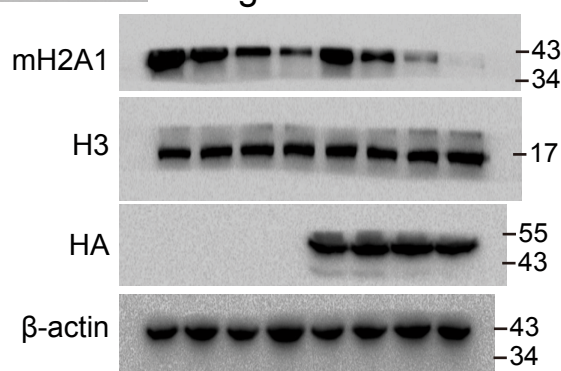

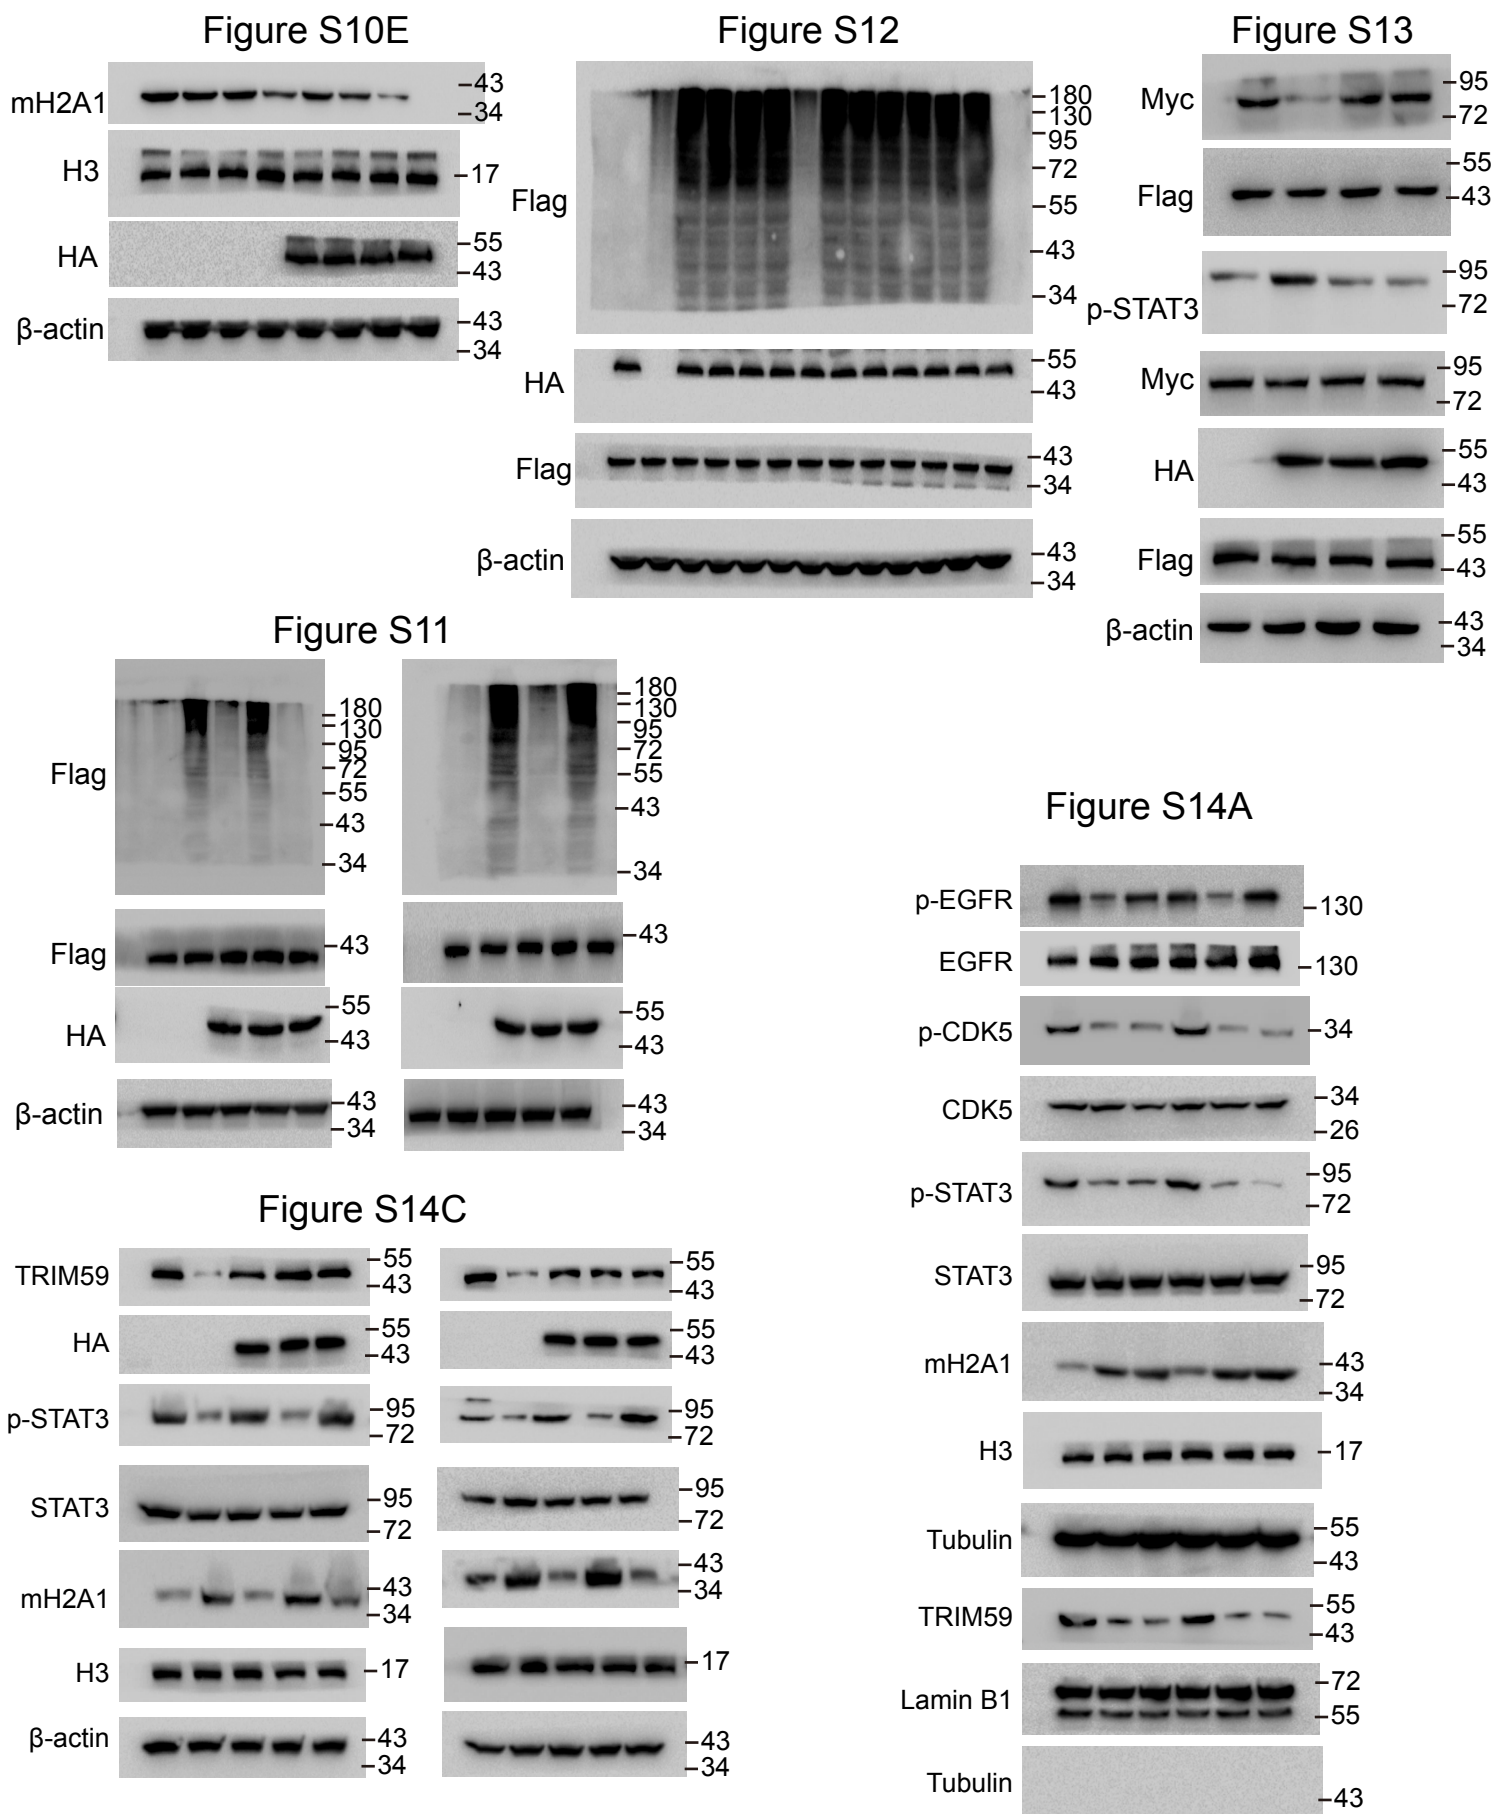

Supplementary Figure 16 Full unedited gels
